# Supplementary material for: Kinetics of versican-expressing macrophages in bone marrow after cord blood stem cell transplantation for treatment of acute myelogenous leukaemia
Source: HighWire-hosted journal article supplement (doi:10.1136/jclinpath-2015-203496), 2016-03-07
Supplement: jclinpath-2015-203496supp_abstract_in_japanese.pdf [file jclinpath-2015-203496supp_abstract_in_japanese.pdf]

**目的** 骨髓におけるバーシカン産生細胞を同定すること。および骨髓再生におけるバーシカンの役割を明らかにするため、急性骨髓性白血病に対して臍帯血幹細胞移植を行った症例の骨髓再生過程に着目して、バーシカン陽性マクロファージ数の経時的变化を解析すること。

**方法** 正形成髄 7 例の骨髓クロット検体を用いて、バーシカン産生細胞を同定した。さらに、臍帯血幹細胞移植を施行した急性骨髓性白血病患者（生着例 18 例、非生着例 4 例）に対し、骨髓クロット標本における全細胞数、バーシカン陽性細胞数、および CD68 陽性細胞数の変化を経時的に計測した。移植後 16 日から 55 日に採取された骨髓クロット検体を 4 つの時期に分類して検討した。抗バーシカン抗体と抗 CD68 抗体を用いた免疫組織化学染色を行い、単位面積当たりの陽性細胞数を計測し、 $\text{平均値} \pm \text{標準偏差}$ を算出した。細胞数の経時的な変化を解析するとともに、年齢をあわせた人の正形成骨髓の細胞数とも比較した。

**結果** 二重免疫染色を行った結果、骨髓においてバーシカンを発現する細胞はマクロファージであることが分かった。移植後の骨髓における細胞数を経時的に調べると、バーシカン陽性細胞数と全細胞数の間に逆相関が見られた。非生着例では、年齢と採取日をあわせた生着例に比べて、バーシカン陽性マクロファージ数が減少していることが分かった。

**まとめ** バーシカンには、臍帯血幹細胞移植の患者における造血を亢進する働きがあると考えられた。
